# Supplementary material for: Simple devising of N-doped carbon dots (N-CDs) as a low-cost probe for selective environmental toxin detection and security applications
Source: Royal Society of Chemistry journal article supplement (doi:10.1039/d3nj04571d), 2023-11-17
Supplement: d3nj04571d1.pdf [file d3nj04571d1.pdf]

## Supporting Information

### Simple Devising of N-doped Carbon Dots (N-CDs) as Low-Cost Probe for Selective Detection of Environment Toxin and Security Applications

Kumaresan Annamalai <sup>a</sup>, Arun Annamalai <sup>a</sup>, Ramya Ravichandran <sup>a</sup>, Anandhavalli Jeevarathinam <sup>a</sup>, Padmanaban Annamalai <sup>b</sup>, Hector Valdes <sup>b</sup> Sundaravadivel Elumalai\*

a. Department of Chemistry, SRM Institute of Science and Technology, Kattankulathur, Tamil Nadu – 603 203, India.

b. Facultad de Ingeniería, Universidad Catolica de la Santísima Concepcion, Concepcion, Chile.

\*Corresponding author's E-mail: [sundaravadivelchem@gmail.com](mailto:sundaravadivelchem@gmail.com)

#### Stability and Surface Charge Studies of N-CDs.

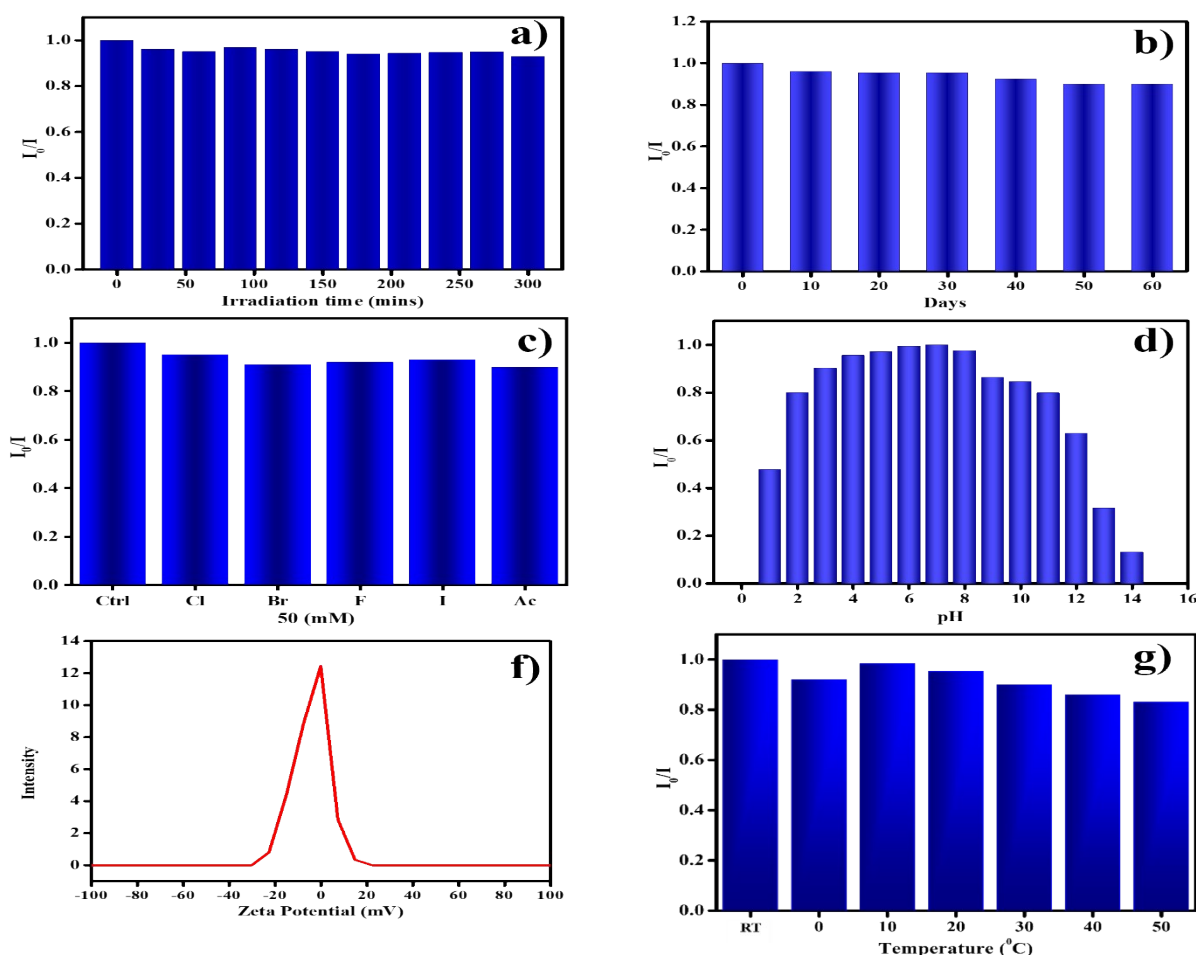

**Figure S1.** (a) Photostability of N-CDs, (b) PL intensity against 60 days of N-CDs storage time, (c) PL intensity against Photobleaching studies of different ions, (d) pH studies of N-CDs and (f) Zeta potential of N-CDs, (g) temperature dependent studies on N-CDs.

**Table S1.** Comparison of LOD with Reported PA Sensor Probes.

| <b>Detection Probe</b> | <b>Detection Method</b> | <b>Linear Range</b>   | <b>Limit of Detection</b>        | <b>Reference</b> |
|------------------------|-------------------------|-----------------------|----------------------------------|------------------|
| CDs                    | Fluorescence            | 1-10 $\mu\text{M}$    | 0.24 $\mu\text{M}$               | 1                |
| N-CDs                  | Fluorescence            | 0.3-3.3 $\mu\text{M}$ | 0.11 $\mu\text{M}$               | 2                |
| N-CDs                  | Fluorescence            | 2-45 $\mu\text{M}$    | 0.45 $\mu\text{M}$               | 3                |
| N-CDs                  | Fluorescence            | 1 - 26 $\mu\text{M}$  | 82.9 nM<br>(0.08 $\mu\text{M}$ ) | Present work     |

**Table S2.** Comparison of LOD with Reported  $\text{Fe}^{3+}$  Sensor Probes.

| <b>Detection Probe</b>               | <b>Detection Method</b> | <b>Linear Range</b> | <b>Limit of Detection</b>      | <b>Reference</b> |
|--------------------------------------|-------------------------|---------------------|--------------------------------|------------------|
| Citric acid-Glycine based CDs        | Fluorescence            | 0-3.5 $\mu\text{M}$ | 0.21 $\mu\text{M}$             | 4                |
| N-doped Cellulose based CDs          | Fluorescence            | 0-100 $\mu\text{M}$ | 1.14 $\mu\text{M}$             | 5                |
| Functionalized Citric acid-based CDs | Fluorescence            | 0-300 $\mu\text{M}$ | 13.68 $\mu\text{M}$            | 6                |
| N-CDs                                | Fluorescence            | 1-40 $\mu\text{M}$  | 30 nM<br>(0.03 $\mu\text{M}$ ) | Present work     |

**Table. S3.** Comparison of LOD with Reported Hg<sup>2+</sup> Sensor Probes

| Detection Probe                     | Detection Method | Linear Range     | Limit of Detection        | Reference    |
|-------------------------------------|------------------|------------------|---------------------------|--------------|
| N, S, P co-doped Cucumber based CDs | Fluorescence     | 1-70 $\mu$ M     | 0.18 $\mu$ M              | 7            |
| Hetero atom doped CDs               | Fluorescence     | 0-12 $\mu$ M     | 226 nM                    | 8            |
| CDs                                 | Fluorescence     | 0-50 $\mu$ M     | 0.41 $\mu$ M              | 9            |
| N-CDs                               | Fluorescence     | 6.5 - 50 $\mu$ M | 160 nM<br>(0.016 $\mu$ M) | Present work |

**Table S4:** Detection of Fe<sup>3+</sup> & Hg<sup>2+</sup> and PA in Drinking Water (n=3).

| Sample           | Spiked ( $\mu$ M) | Detected ( $\mu$ M) | Recovery (%) | RSD (%) |
|------------------|-------------------|---------------------|--------------|---------|
| Fe <sup>3+</sup> | 10                | 8.96                | 89.6         | 2.45    |
|                  | 20                | 19.12               | 95.6         | 2.33    |
|                  | 30                | 29.99               | 99.9         | 4.12    |
| Hg <sup>2+</sup> | 10                | 9.41                | 94.0         | 1.76    |
|                  | 20                | 19.79               | 98.9         | 2.56    |
|                  | 30                | 28.1                | 93.6         | 2.56    |
| PA               | 10                | 8.43                | 84.3         | 2.34    |
|                  | 20                | 18.87               | 93.4         | 2.65    |
|                  | 30                | 30.96               | 103.2        | 3.92    |

**Table S5.** Comparison of N-CDs as Probe for Detection of Nitro-explosives and Metal ions.

| Nitro-explosives and Metal ions | K <sub>sv</sub> Value                 | Linear Range     | Limit of Detection | Lifetime (ns) | Mechanism |
|---------------------------------|---------------------------------------|------------------|--------------------|---------------|-----------|
| PA                              | 3.3 x 10 <sup>4</sup> M <sup>-1</sup> | 1 - 26 $\mu$ M   | 82.9 nM            | 10.2          | FRET      |
| Fe <sup>3+</sup>                | 1.8 x 10 <sup>5</sup> M <sup>-1</sup> | 1-40 $\mu$ M     | 30 nM              | 10.8          | IFE       |
| Hg <sup>2+</sup>                | 3.6 x 10 <sup>4</sup> M <sup>-1</sup> | 6.5 - 50 $\mu$ M | 160 nM             | 10.4          | PET       |

**Table S6.** Comparison of High Quantum Dots with Unique Properties

| Starting Material             | Synthesis Method | Quantum Yield (%) | Applications                                                                      | Reference    |
|-------------------------------|------------------|-------------------|-----------------------------------------------------------------------------------|--------------|
| Citric acid-Glycine based CDs | Hydrothermal     | 29.8              | Fe <sup>3+</sup> and Fingerprint detection                                        | 4            |
| N-doped Cellulose based CDs   | Hydrothermal     | 30.3              | Fe <sup>3+</sup> detection and Bioimaging                                         | 5            |
| Ammonium citrate based CDs    | Hydrothermal     | 22.79             | Mercury (II) and Glutathione Detection                                            | 9            |
| N-CDs                         | Microwave        | 33                | Fe <sup>3+</sup> , Hg <sup>2+</sup> and PA detection, Anti-counterfeiting studies | Present work |

## REFERENCES

1. Khan, Z. M. S. H. *et al.* A facile one step hydrothermal synthesis of carbon quantum dots for label -free fluorescence sensing approach to detect picric acid in aqueous solution. *J Photochem Photobiol A Chem* **388**, (2020).
2. Kalanidhi, K. & Nagaraaj, P. Facile and Green synthesis of fluorescent N-doped carbon dots from betel leaves for sensitive detection of Picric acid and Iron ion. *J Photochem Photobiol A Chem* **418**, (2021).
3. Abbasi, A. & Shakir, M. Simple One-step Solid-state Synthesis of Highly Crystalline N Doped Carbon Dots As Selective Turn Off-sensor for Picric Acid and Metanil Yellow. *J Fluoresc* **32**, 1239–1246 (2022).
4. Feng, R. Q., Yuan, Z. Y. & Ren, T. Z. A facile hydrothermal method for preparation of fluorescent carbon dots on application of Fe<sup>3+</sup> and fingerprint detection. *Methods Appl Fluoresc* **7**, (2019).
5. Liu, Z. *et al.* Oxidized nanocellulose facilitates preparing photoluminescent nitrogen-doped fluorescent carbon dots for Fe<sup>3+</sup> ions detection and bioimaging. *Chemical Engineering Journal* **384**, (2020).

6. Xie, Z., Sun, X., Jiao, J. & Xin, X. Ionic liquid-functionalized carbon quantum dots as fluorescent probes for sensitive and selective detection of iron ion and ascorbic acid. *Colloids Surf A Physicochem Eng Asp* **529**, 38–44 (2017).
7. Wang, C., Sun, D., Zhuo, K., Zhang, H. & Wang, J. Simple and green synthesis of nitrogen-, sulfur-, and phosphorus-co-doped carbon dots with tunable luminescence properties and sensing application. *RSC Adv* **4**, 54060–54065 (2014).
8. Shangguan, J. *et al.* Highly Fe<sup>3+</sup>-Selective Fluorescent Nanoprobe Based on Ultrabright N/P Codoped Carbon Dots and Its Application in Biological Samples. *Anal Chem* **89**, 7477–7484 (2017).
9. Cai, L., Fu, Z. & Cui, F. Synthesis of Carbon Dots and their Application as Turn Off–On Fluorescent Sensor for Mercury (II) and Glutathione. *J Fluoresc* **30**, 11–20 (2020).
